# Supplementary material for: Divergent Asymmetric Total Synthesis of All Four Pestalotin Diastereomers from (R)-Glycidol
Source: MDPI journal article supplement (doi:10.3390/molecules25020394), 2020-01-17

X : parts per Million : Proton

abundance

0 1.0 2.0 3.0 4.0 5.0 6.0 7.0 8.0

<sup>1</sup>H NMR

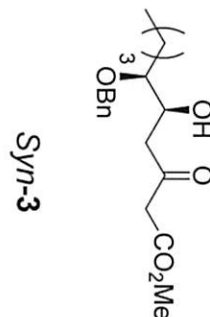

12.106

7.369  
7.353  
7.346  
7.330  
7.317  
7.291  
7.281

4.644  
4.632  
4.621  
4.501  
4.489  
4.478

4.148

3.726  
3.480  
3.477

2.738  
2.722  
2.718  
2.708

1.638  
1.389  
1.364  
1.349  
1.322  
0.922  
0.915  
0.908  
0.901  
0.894

5.50

11.46  
11.46

3.20

2.00

1.00

6.37

6.87

3.17

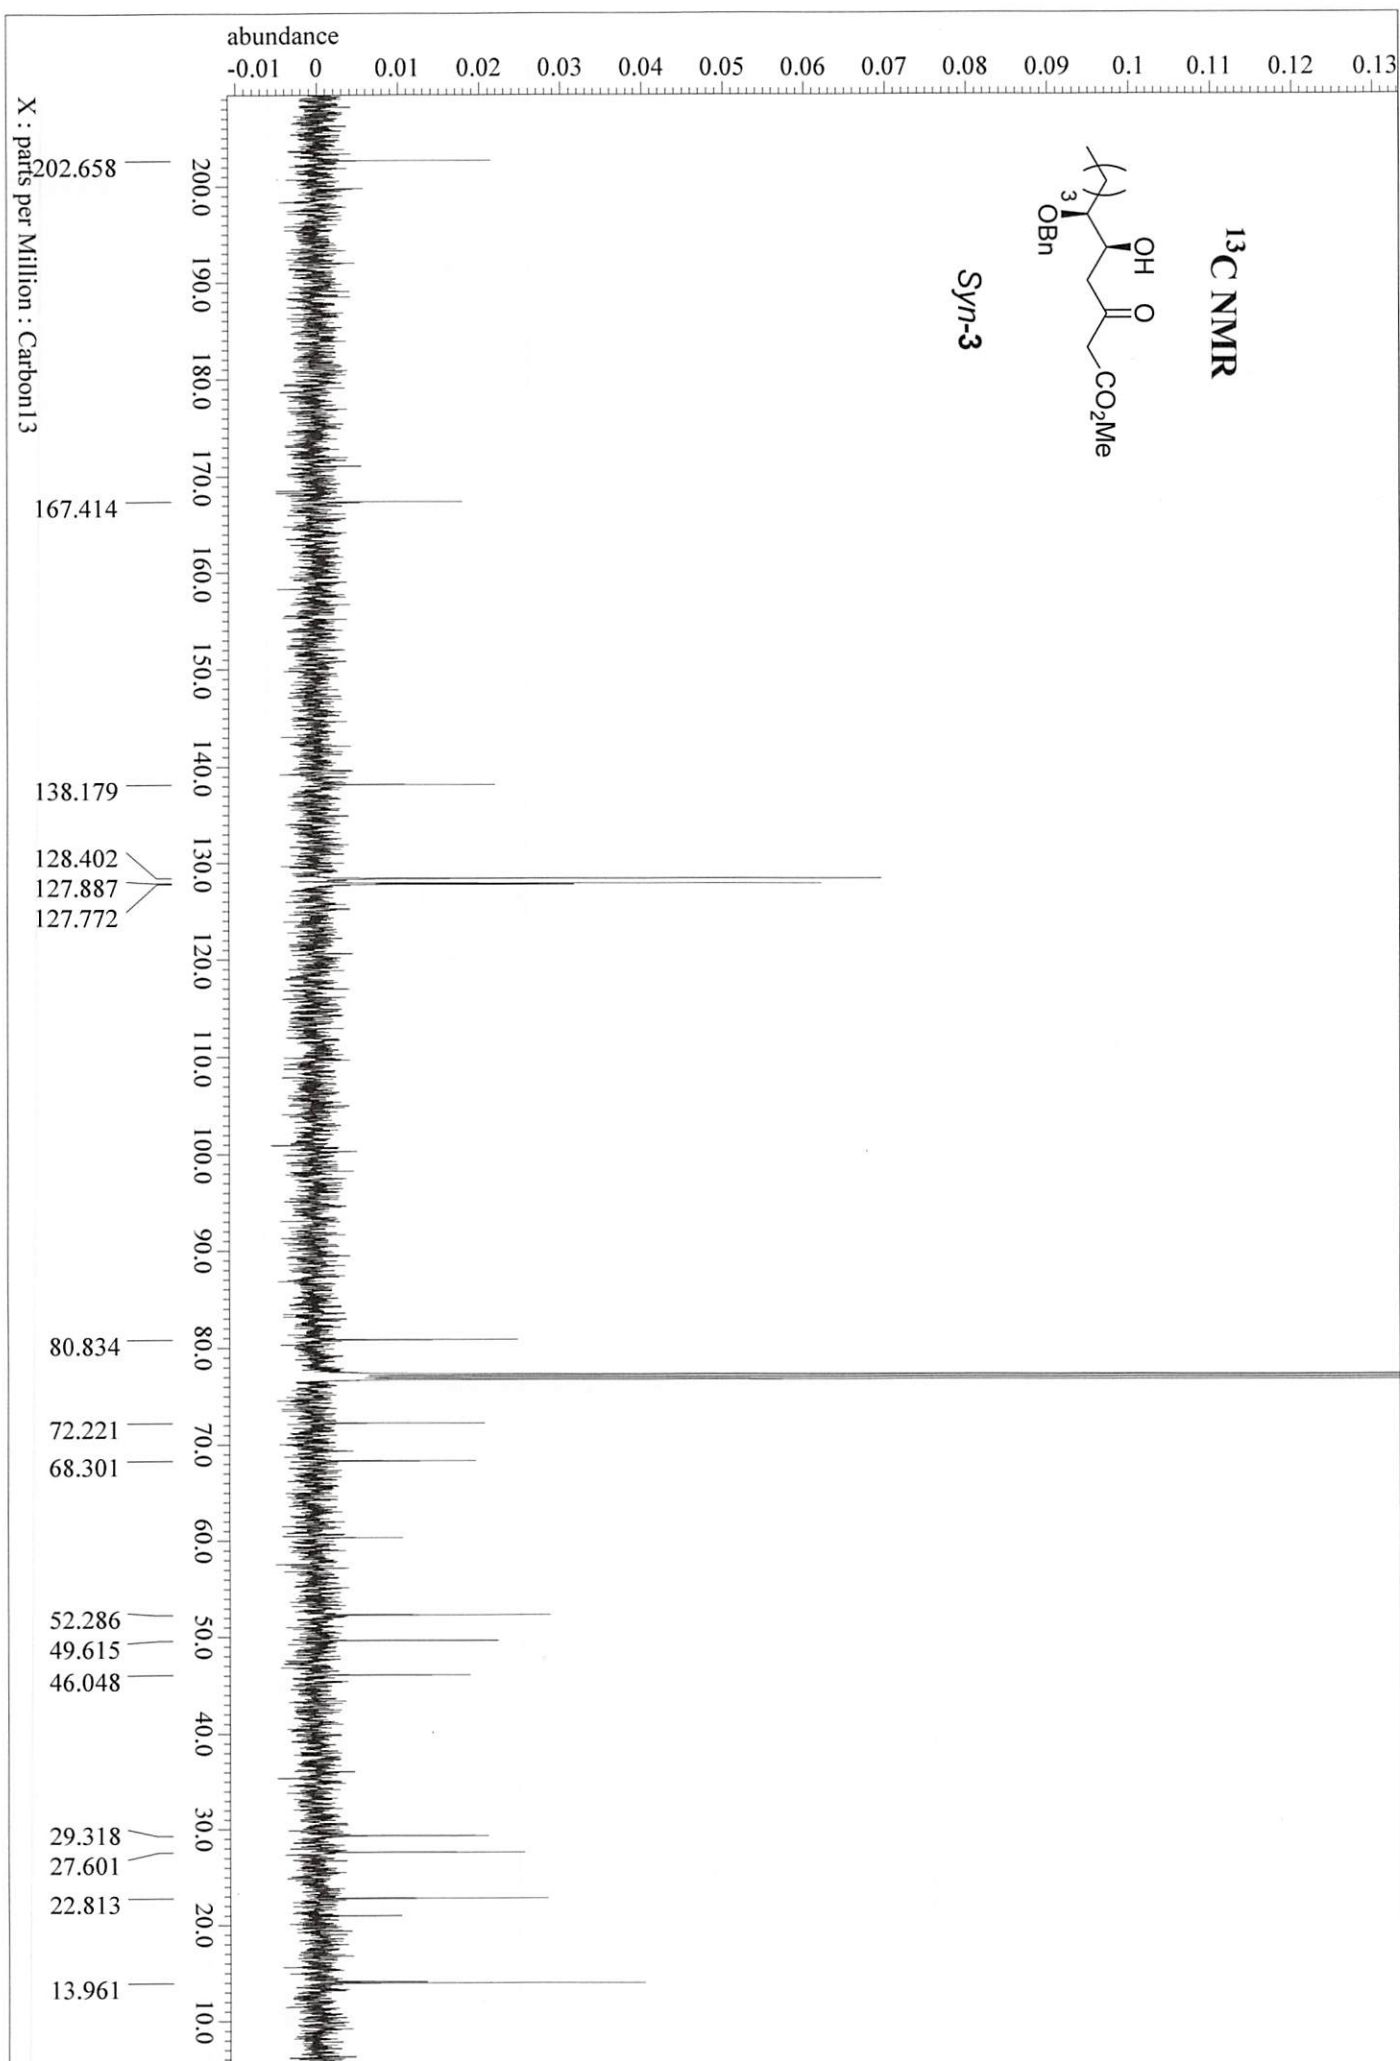

X : parts per Million : Proton

abundance

0 1.0 2.0 3.0 4.0 5.0 6.0 7.0 8.0 9.0 10.0

<sup>1</sup>H NMR

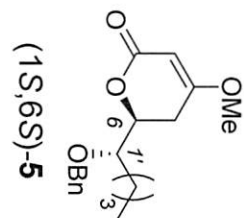

7.360  
7.351  
7.342  
7.310  
7.301  
7.293  
7.282  
7.274

7.0

5.00

6.0

5.136  
5.134  
5.133

5.0

1.00

1.72

4.669  
4.646  
4.629  
4.606  
4.533  
4.506

4.0

1.00

1.00

11.46

14.07

3.741  
3.613  
3.604  
3.596  
3.587

3.0

3.00

1.00

2.697  
2.692  
2.689  
2.666  
2.663  
2.285  
2.277  
2.250  
2.242

2.0

1.00

1.00

13.73

14.08

1.675  
1.563  
1.347  
1.338  
1.325  
1.311  
1.301  
0.908  
0.901  
0.894  
0.888  
0.881

1.0

6.00

3.00

6.87

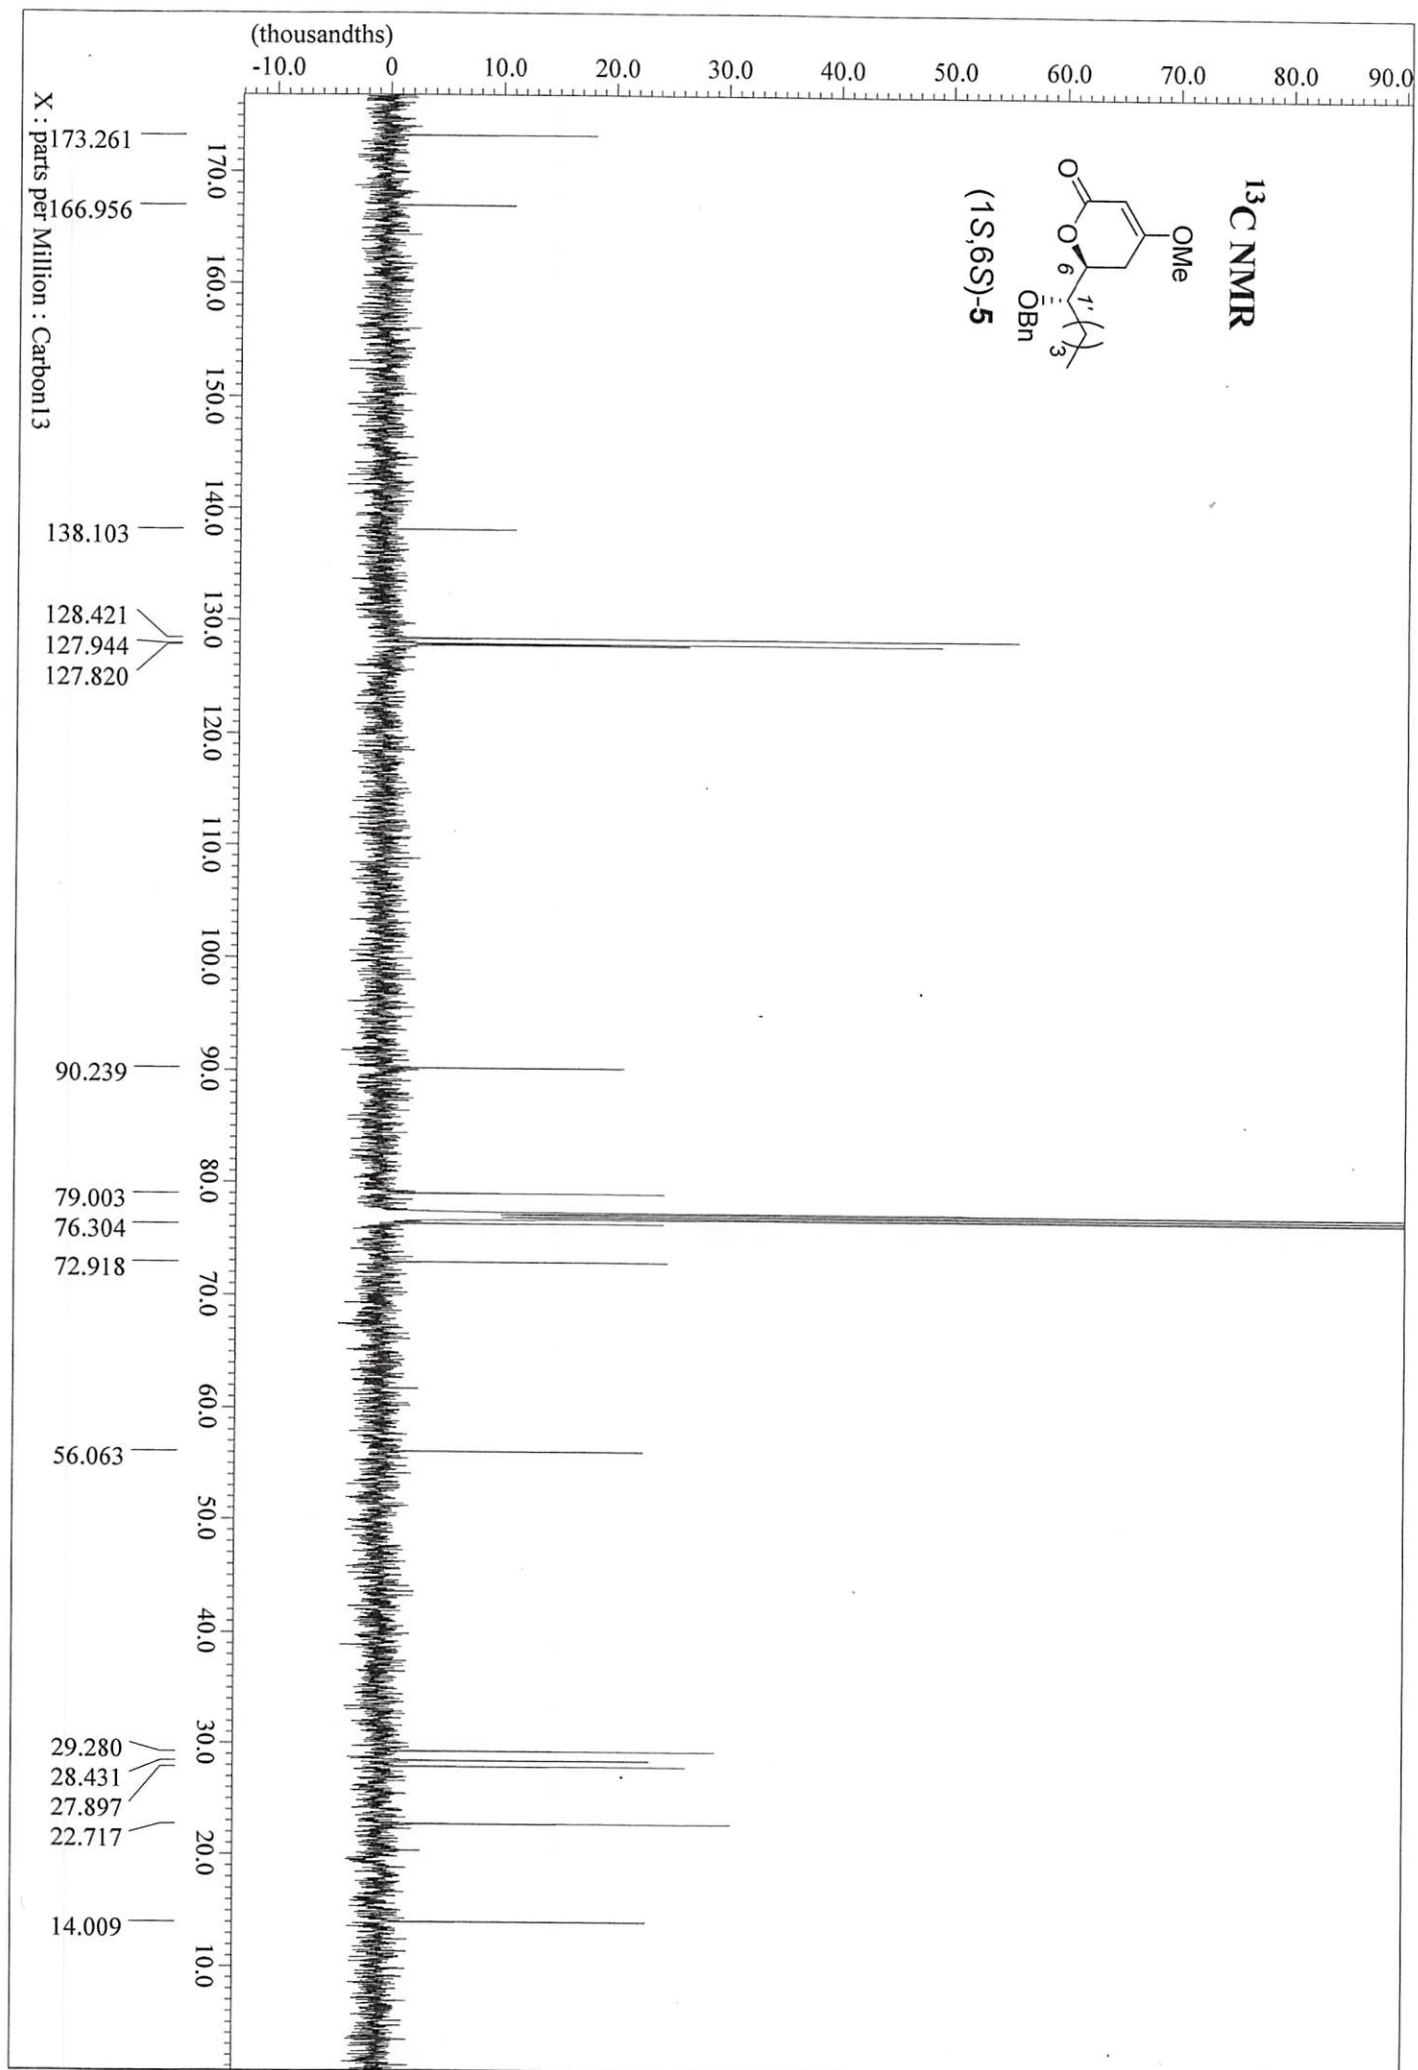

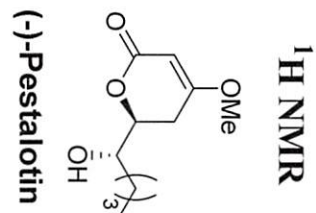

X : parts per Million : Proton

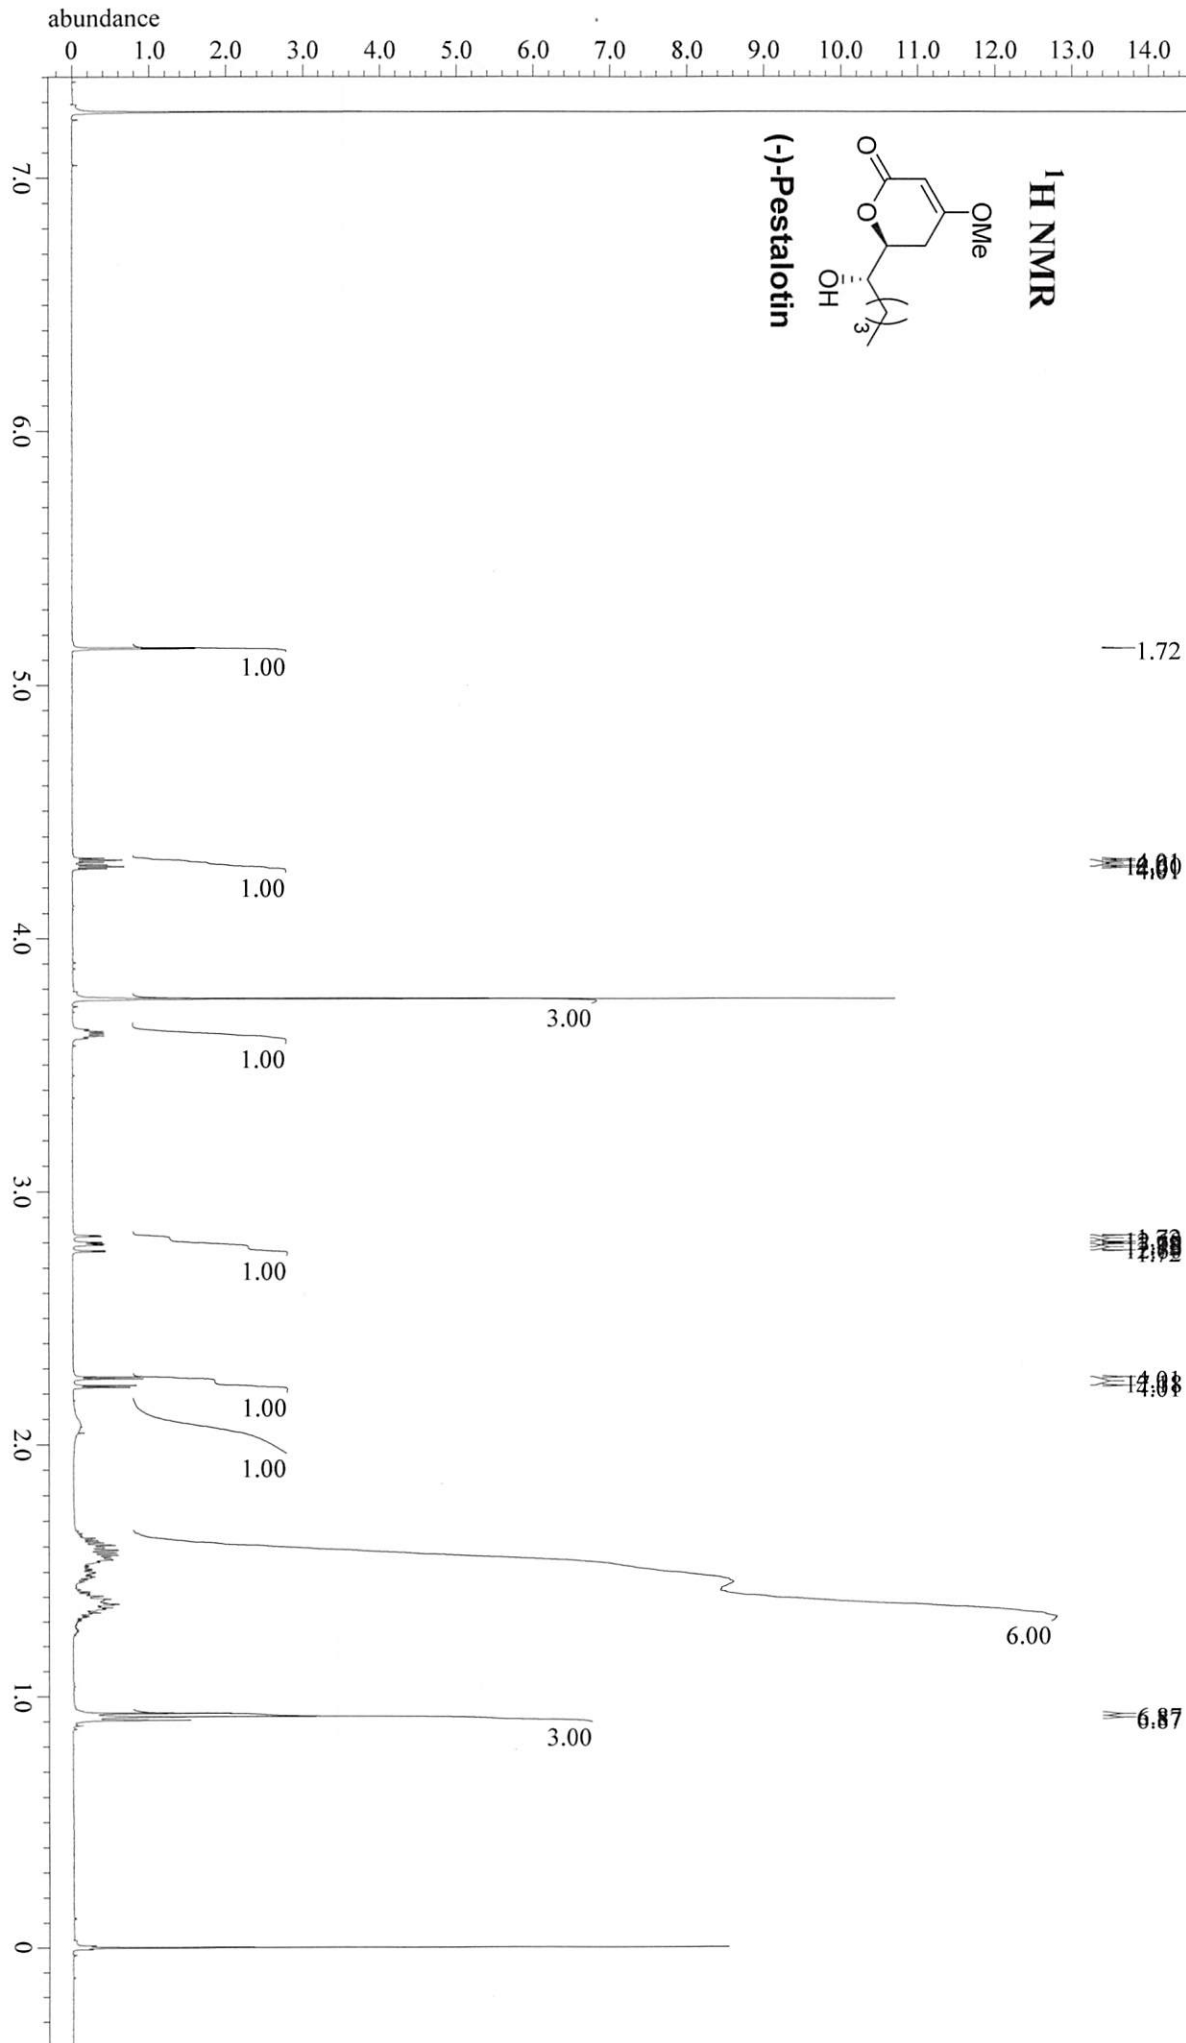

1.72

14.00

12.00

14.00

6.87

# <sup>13</sup>C NMR

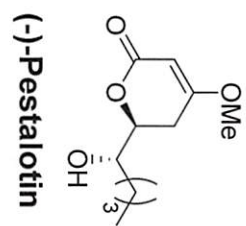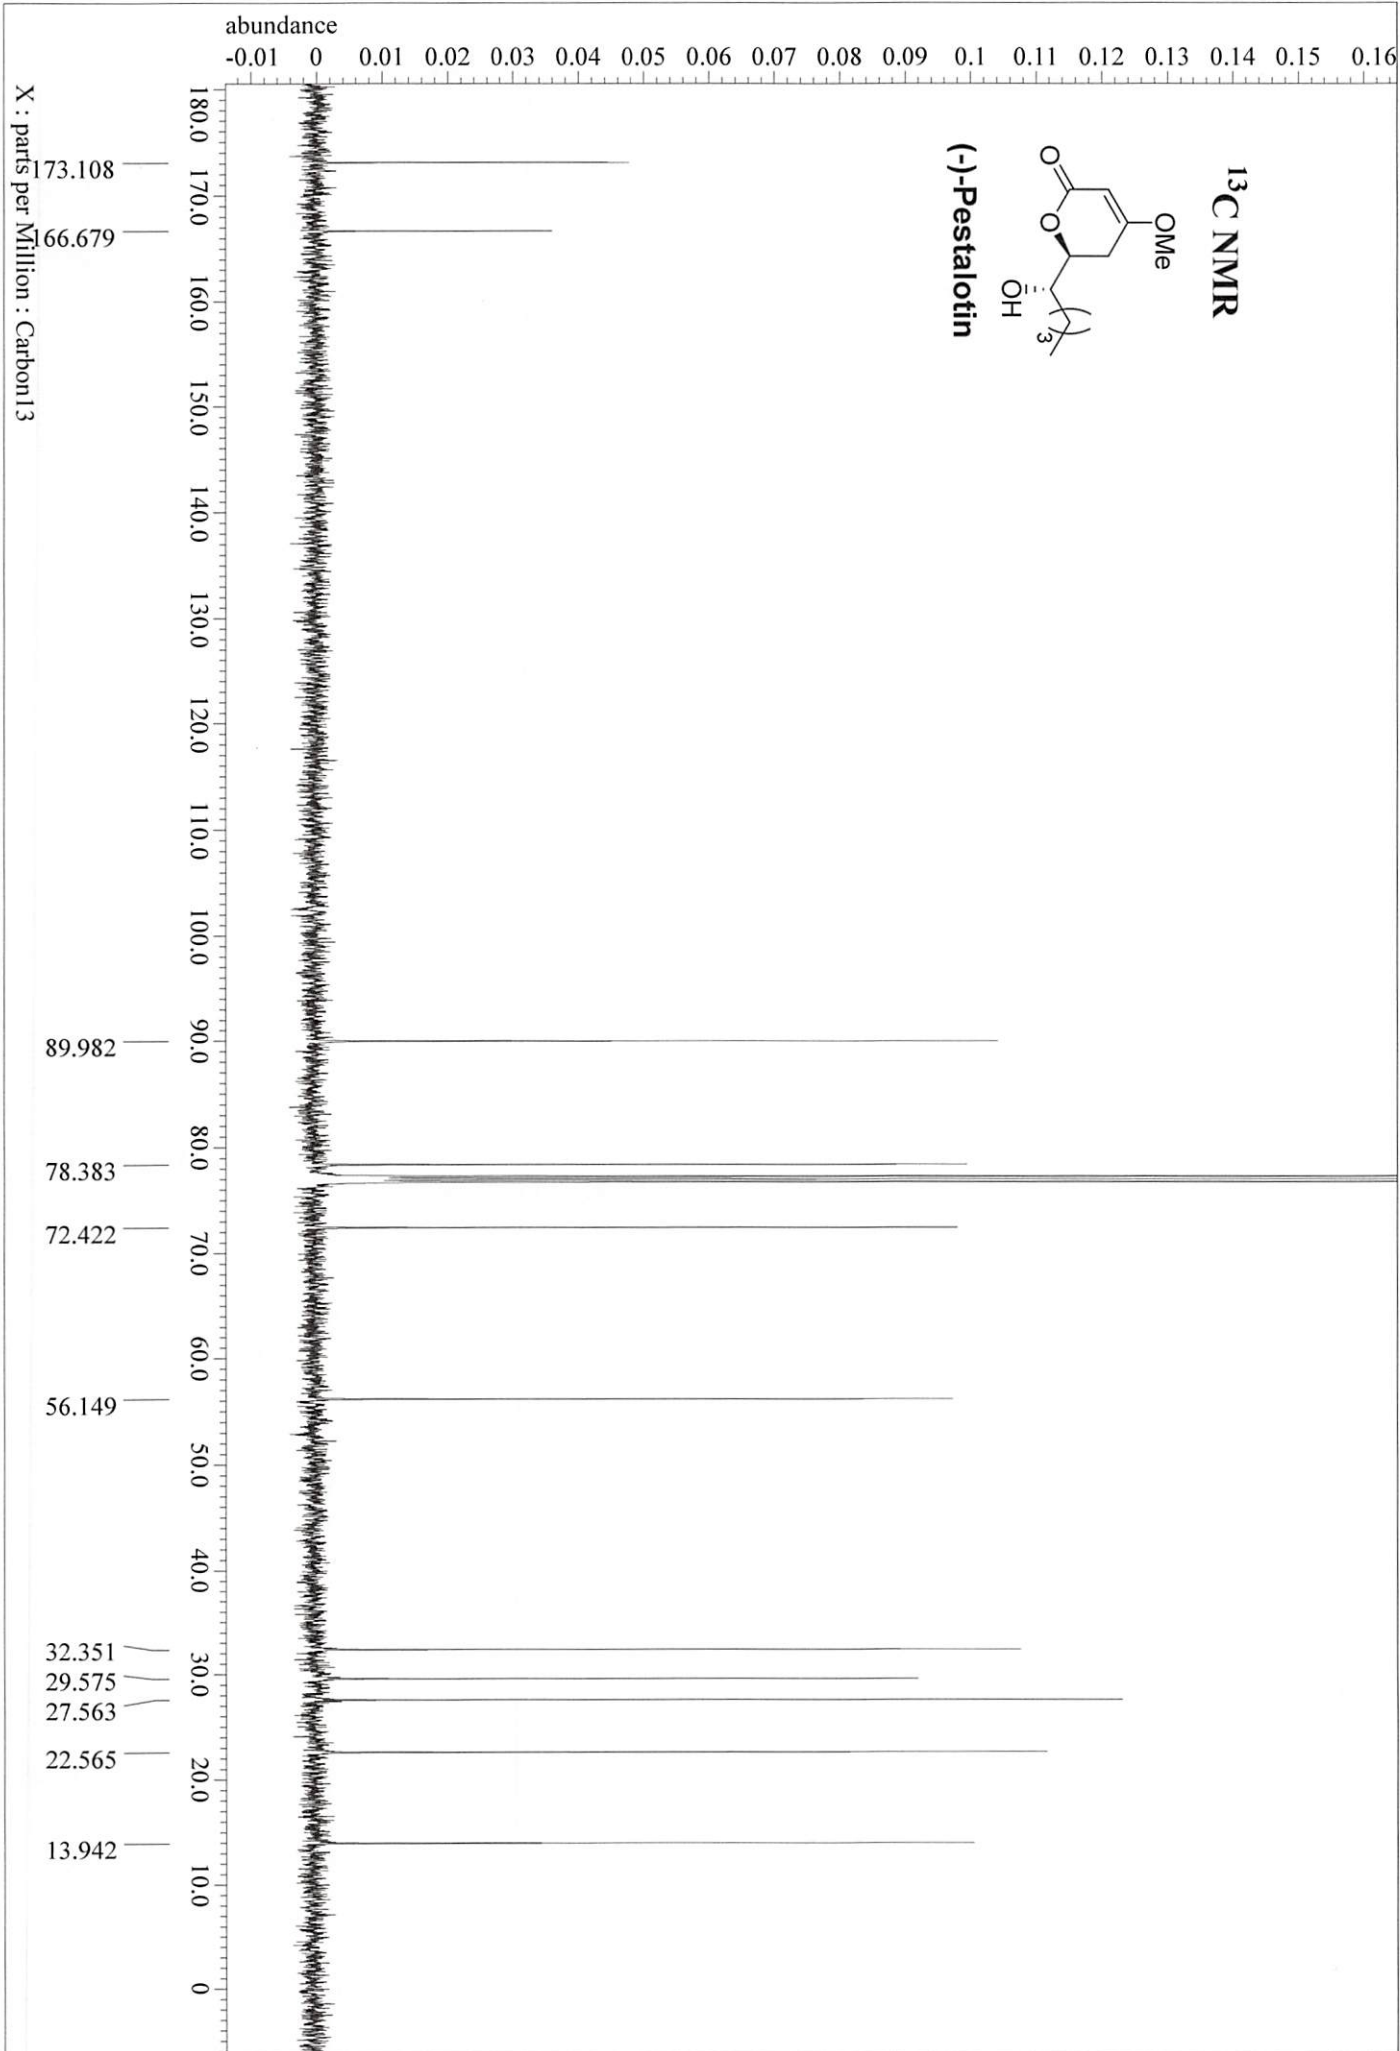



X : parts per Million : Proton

abundance

0 1.0 2.0 3.0 4.0 5.0 6.0 7.0 8.0 9.0 10.0 11.0 12.0

<sup>1</sup>H NMR

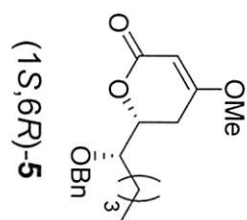

7.348  
7.338  
7.309  
7.301  
7.293  
7.283  
7.275

5.00

5.140  
5.138  
5.136

1.00

1.72

4.726  
4.643  
4.620  
4.404  
4.387  
4.379

1.00

11.46

1.00

11.46

1.00

14.00

3.776  
3.768  
3.761  
3.753  
3.742  
3.730

4.00

2.844  
2.840  
2.809  
2.806  
2.784  
2.781  
2.372  
2.364  
2.337  
2.333  
2.329

1.00

14.00

1.00

14.00

1.555  
1.490  
1.334  
1.326  
1.318  
1.311  
1.293  
0.908  
0.901  
0.894  
0.888  
0.881

6.00

3.00

6.87

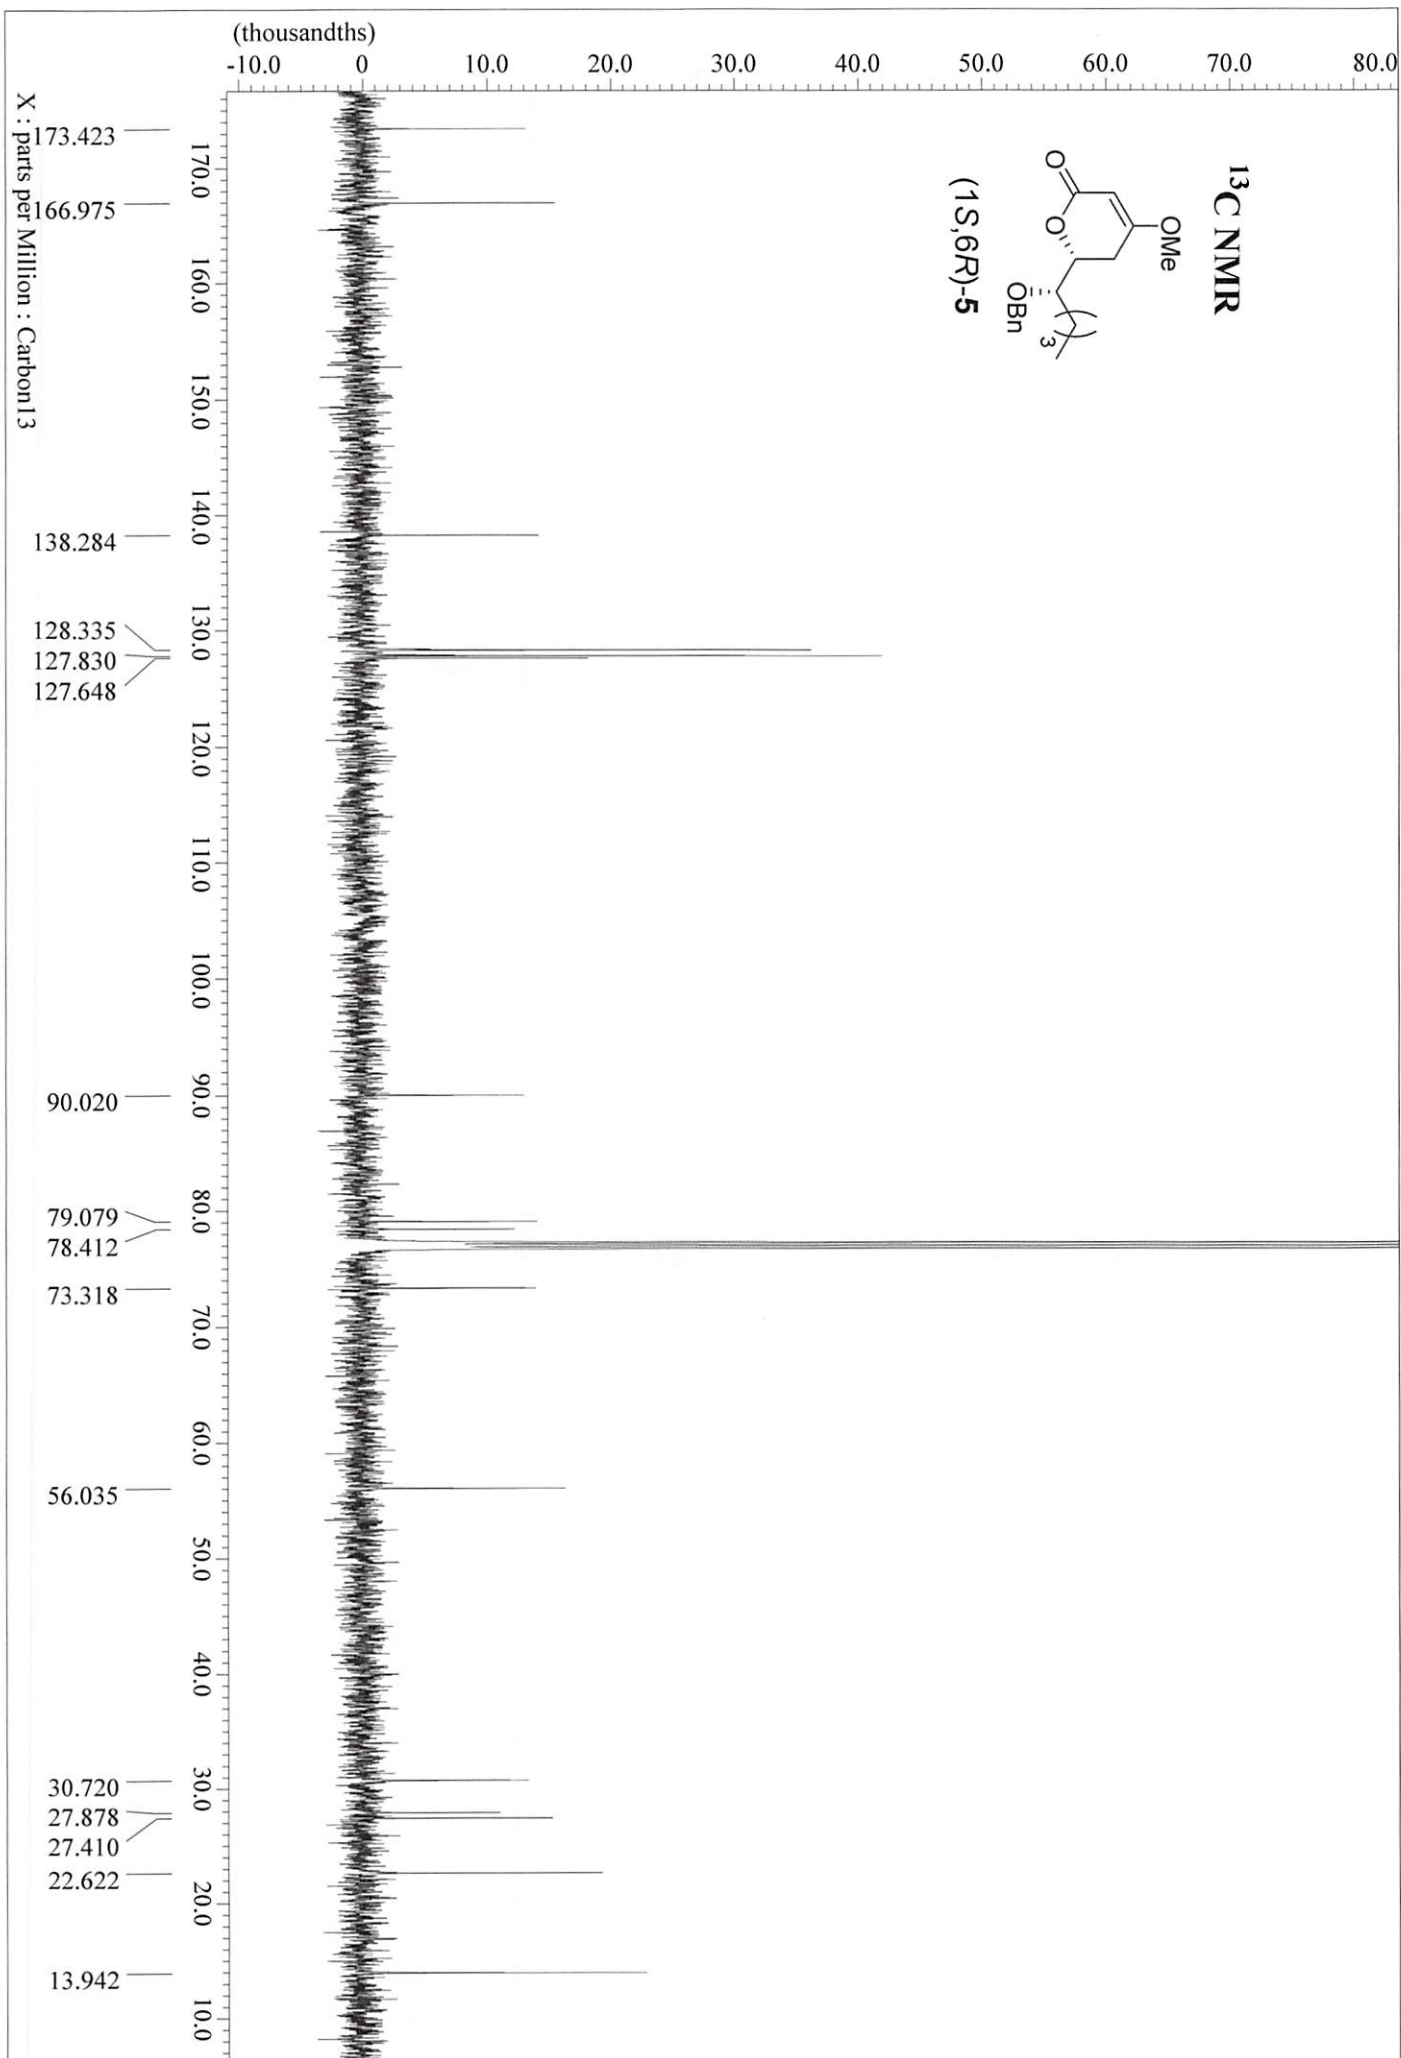



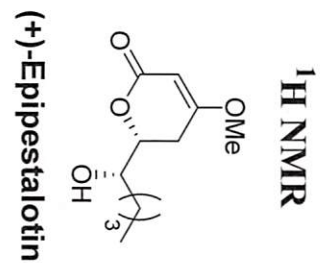

X : parts per Million : Proton

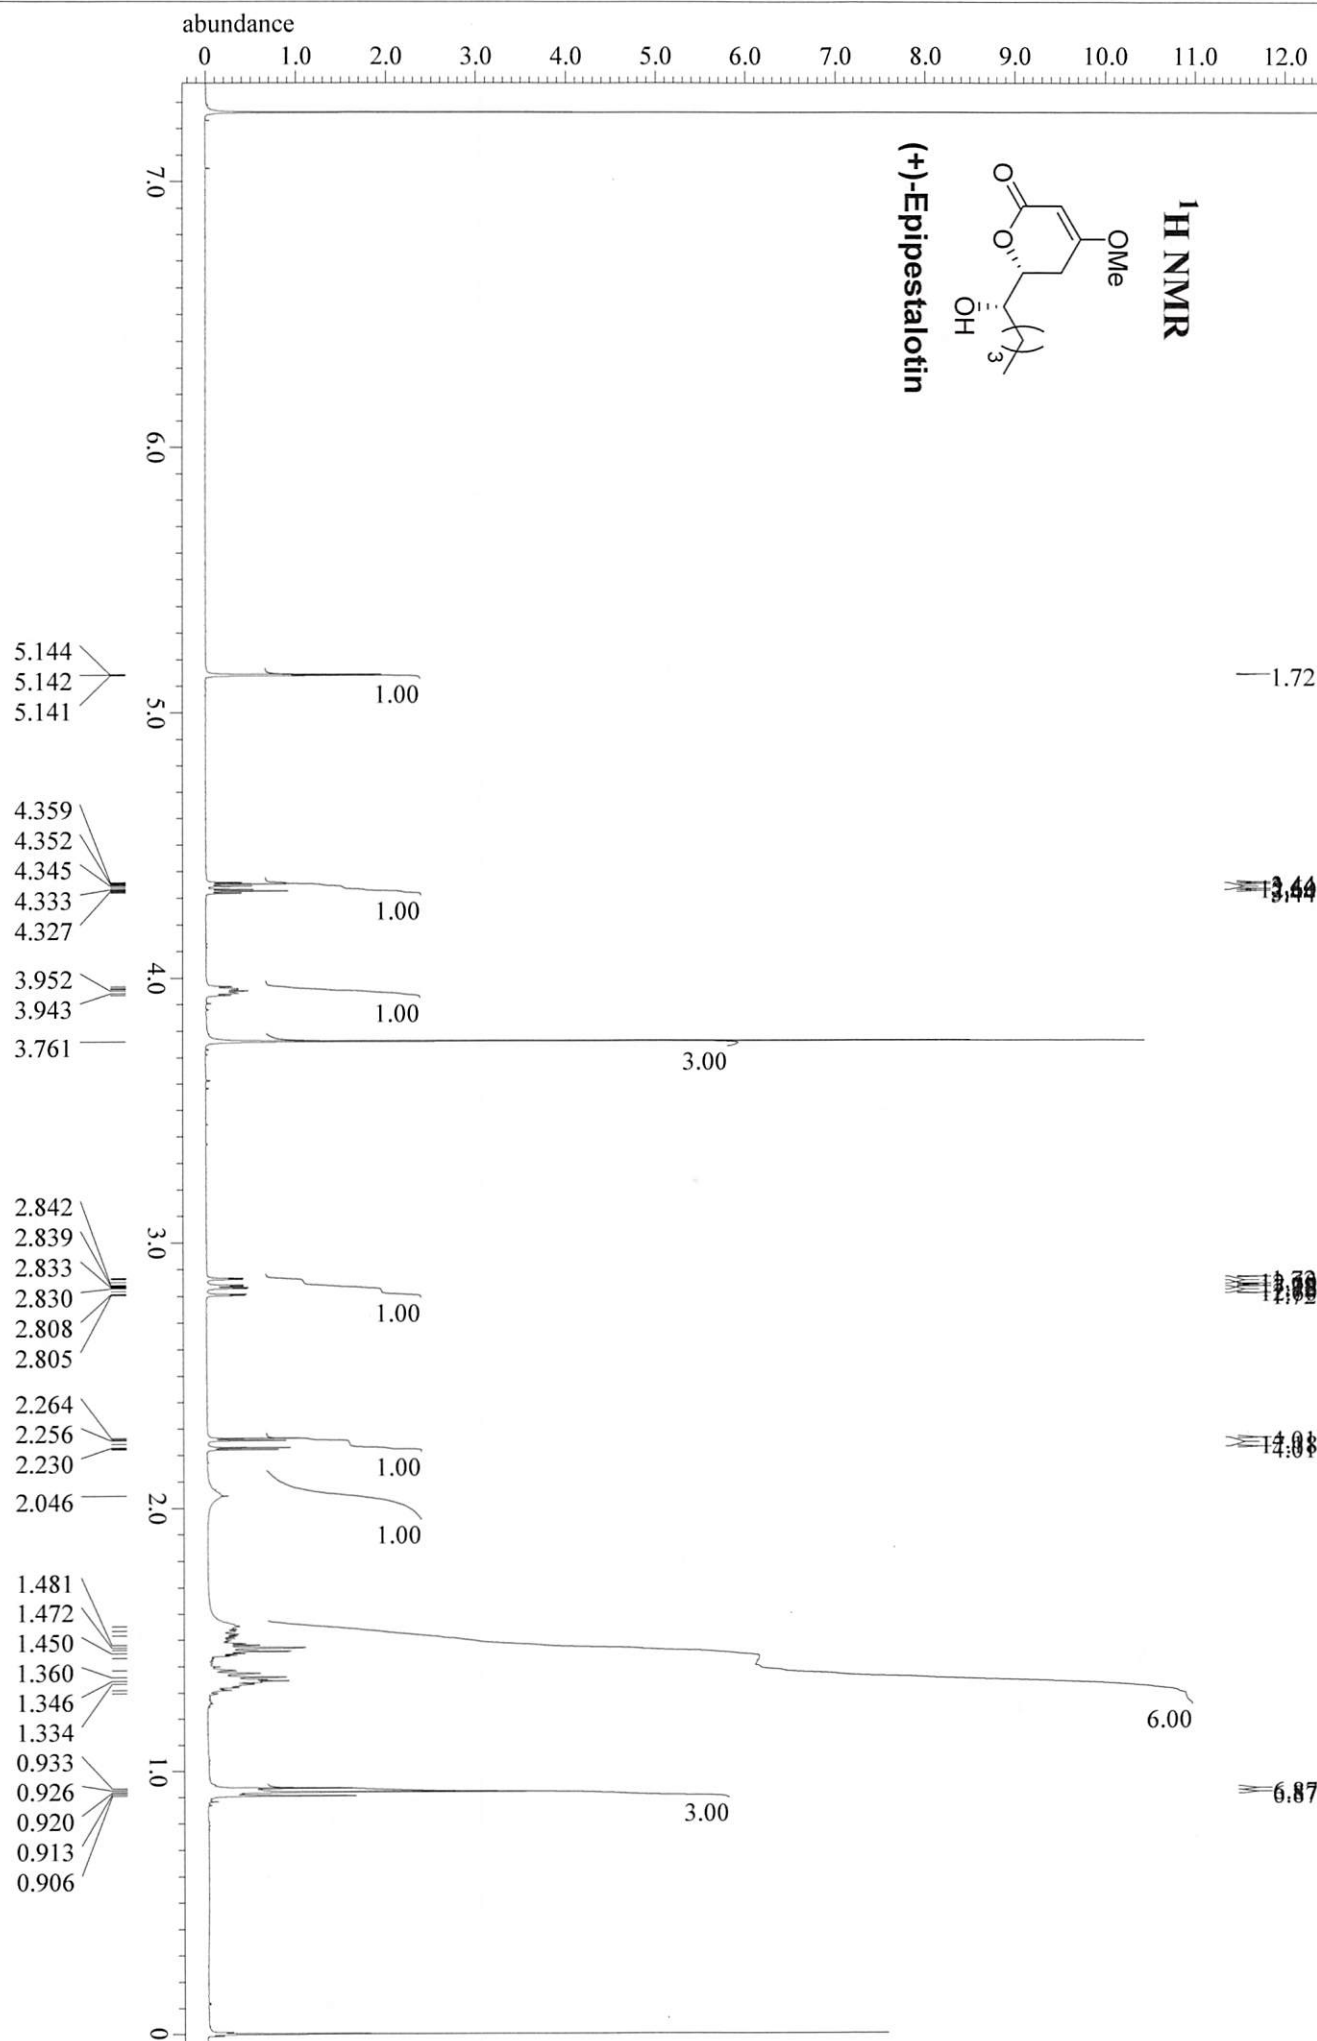

# <sup>13</sup>C NMR

(+)-Epipestalotin

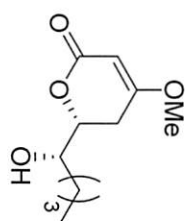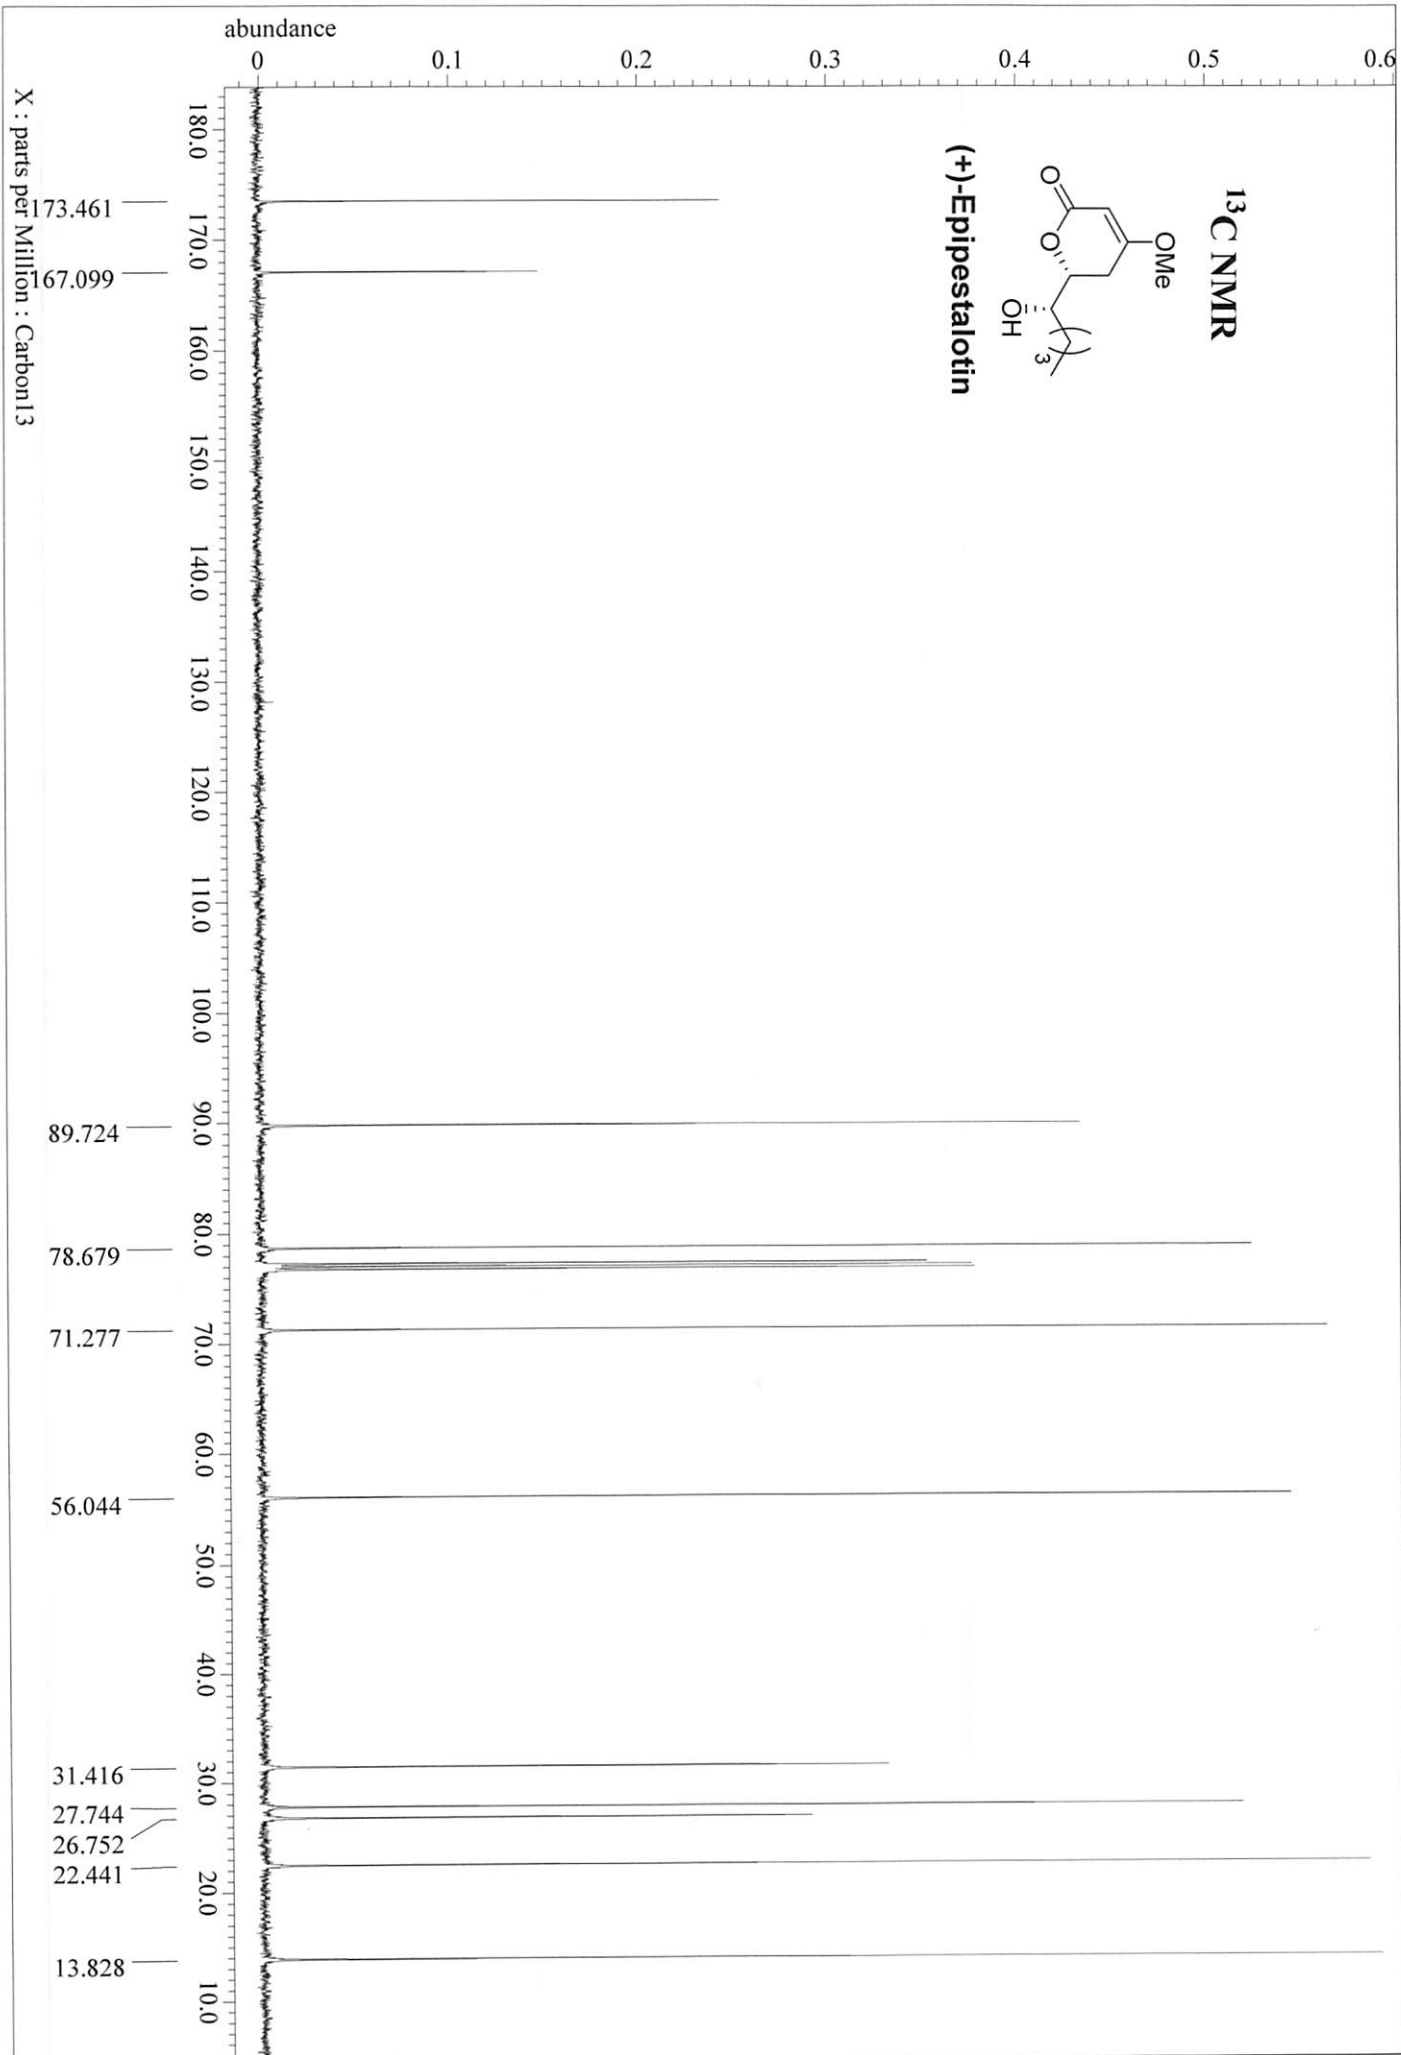

Supplement: s1 [file s1]
