# Supplementary figures and images for: Divergent Asymmetric Total Synthesis of All Four Pestalotin Diastereomers from (R)-Glycidol
Source: MDPI journal article supplement (doi:10.3390/molecules25020394), 2020-01-17

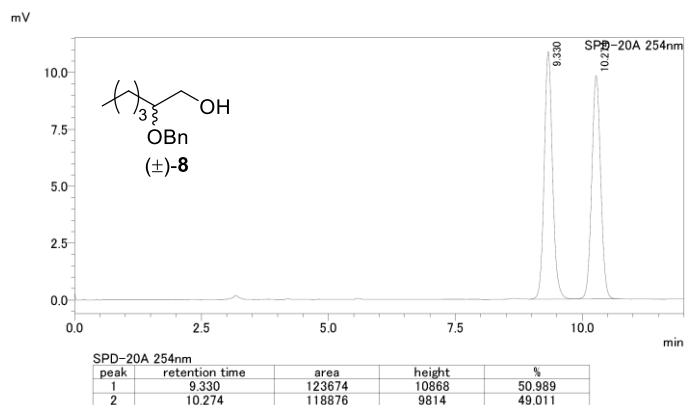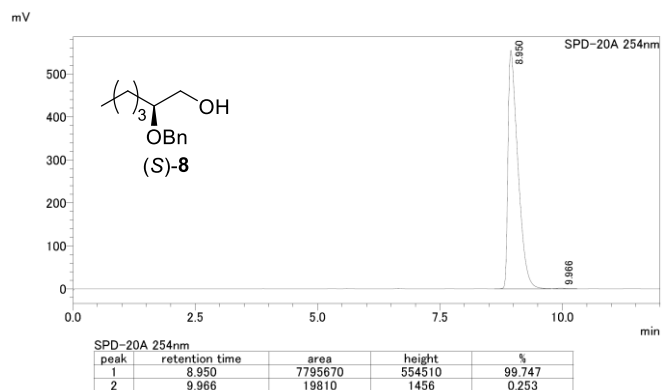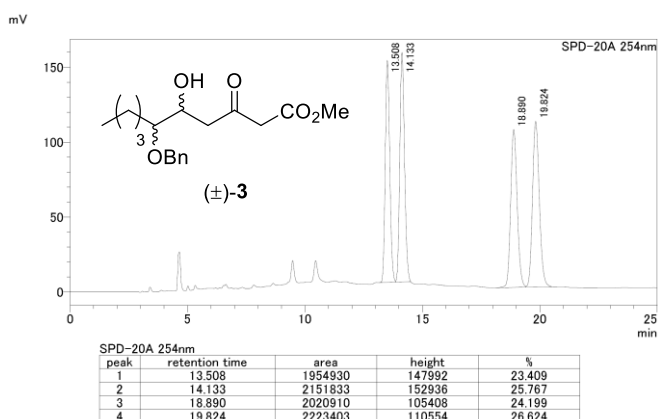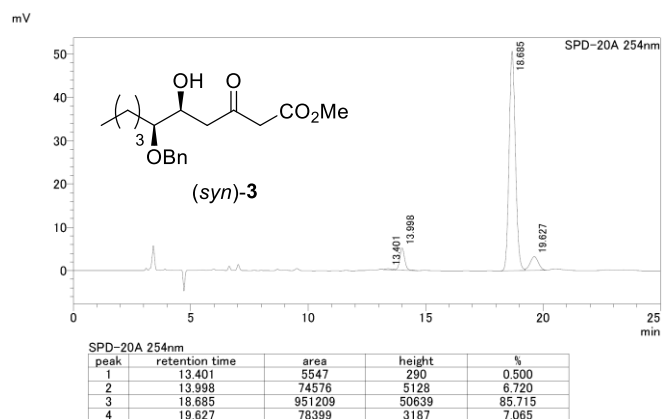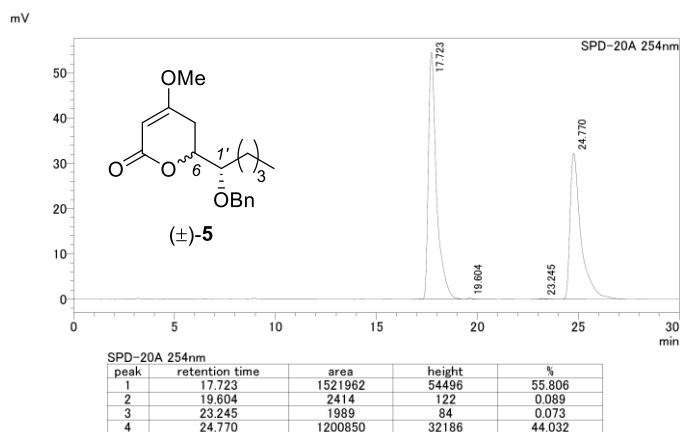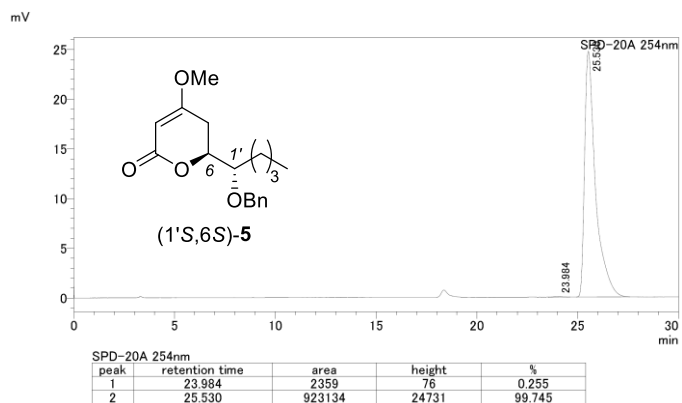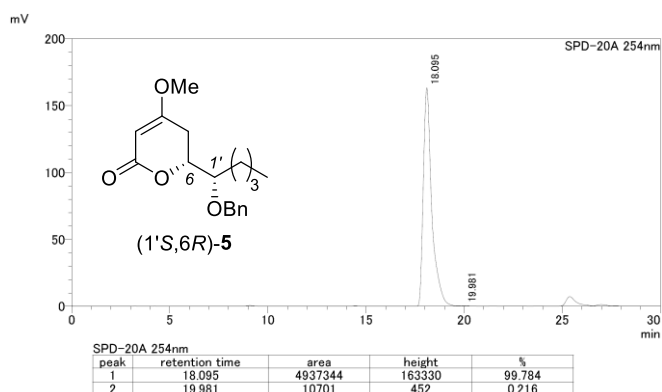

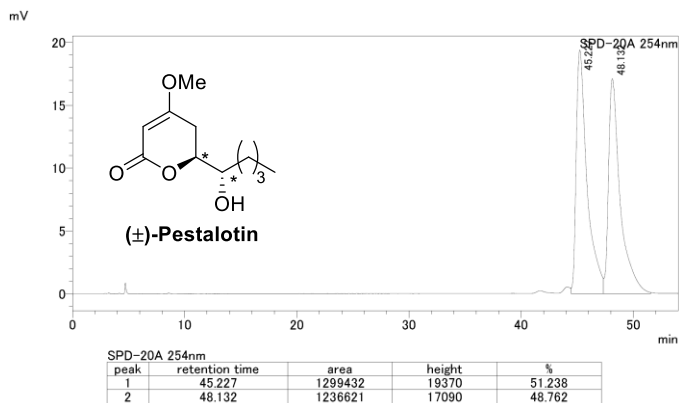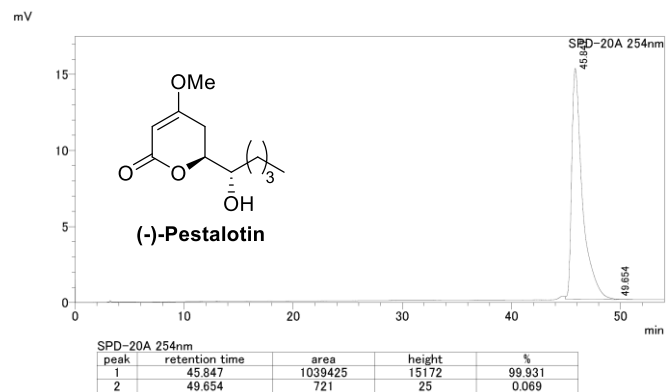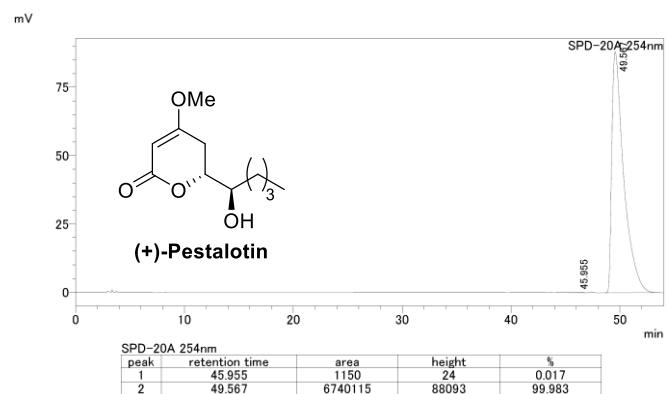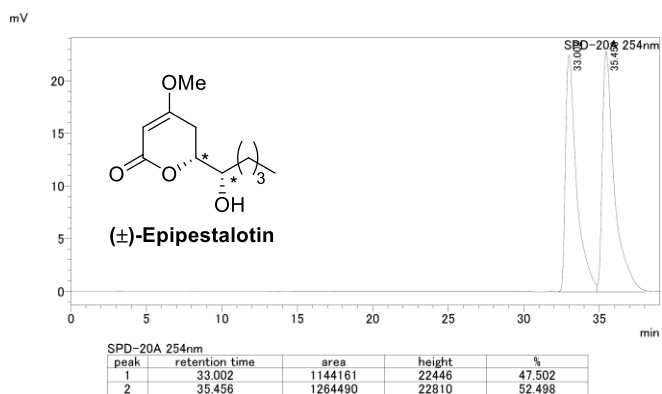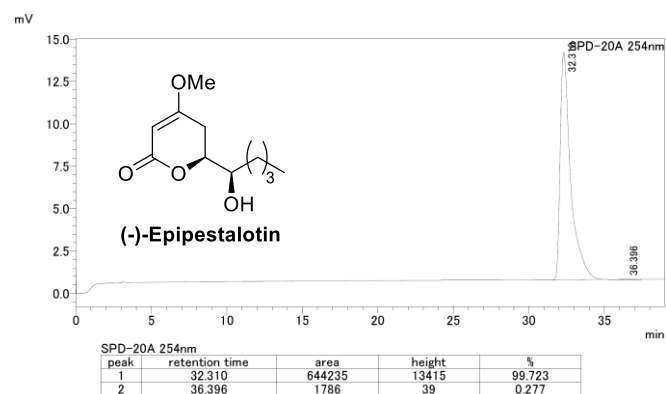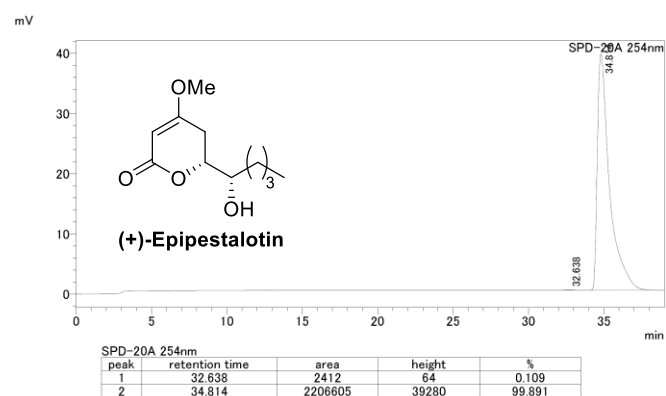

Supplement: s1 [file s1]
